# Supplementary material for: Genome-wide association study of yield components in spring wheat collection harvested under two water regimes in Northern Kazakhstan
Source: PeerJ. 2021 Jul 27;9:e11857. doi: 10.7717/peerj.11857 (PMC8323601; doi:10.7717/peerj.11857)
Supplement: Supplemental Information 2 [file peerj-09-11857-s002.xlsx]

## Sheet: Meteo data
Table 1. Raw meteorological data from 2018-2020 years for Shortandy, North Kazakhstan region (Shortandy)
2018
May			June			July			August			September
Days	Temperature, °C	Rainfall, mm	Days	Temperature, °C	Rainfall, mm	Days	Temperature, °C	Rainfall, mm	Days	Temperature, °C	Rainfall, mm	Days	Temperature, °C	Rainfall, mm
	average			average			average			average			average
1	9.9		1	18.5375	0	1	19.875	0	1	16.575	0	1	6.05	0.2
2	8		2	14.825	6	2	21.825	0	2	17.6	0	2	8	0
3			3	7.9375	6.8	3	18.9437	0	3	19.025	0	3	8.675	0
4	20.55		4	12.45	2	4	16.45	0	4	20.1	0	4	10.4	0
5			5	19.925	0	5	19.4875	0	5	18.275	0	5	10.8625	0.2
6			6	21.8875	0	6	21.7875	0	6	20.35	0	6	11.225	0
7	11.4		7	23.9625	0	7	22.325	0	7	20.9375	1.8	7	11.8375	0
8	12.15		8	19.0625	0.2	8	22.3125	0	8	22.432	0.3	8	9.5	0.6
9	10.2667		9	13.075	0.2	9	23.9	0	9	24.2563	0.3	9	11.7125	0.8
10	15.3333		10	15.625	0	10	24.5875	0	10	21.15	0.3	10	11.1375	0
11			11	18	0	11	22.375	2	11	15.975	3.5	11	4.5875	0
12	12.6		12	15.5375	0.5	12	22.05	4.4	12	13.675	3	12	7.0625	0
13	7.36667		13	12.15	0.7	13	20.8094	14.4	13	16.6625	0.1	13	10.6375	0
14			14	13.3625	0	14	20.175	12	14	20.4	0	14	15.15	0.2
15			15	20.1375	0	15	20.15	10.4	15	22.1625	0	15	16.5	0
16			16	14.2286	3	16	21.2625	0.4	16	17.7875	11.4	16	10.8625	0
17			17	13.325	4.4	17	20.9375	0	17	16.8625	11	17	10.4375	0
18	13.925		18	15.55	1.2	18	21.6875	0	18	20.5	0	18	8.975	0
19	10.4333		19	15.7125	0	19	22.3625	0	19	17.25	0	19	11.5875	0
20			20	17.5875	0.2	20	24.3375	0.5	20	15.6125	12	20	14.425	0.2
21	25.65		21	21.0875	0.2	21	20	2.5	21	10.45	53	21	9.9	0.6
22	10.4125	8	22	18.6375	8.2	22	14.775	31	22	14.575	13	22	10.275	14.6
23	8.1875	0.2	23	16.9625	8	23	10.4625	5	23	18.5	0	23	10.725	12.4
24	4.575	0	24	17.3344	0	24	11.5375	7.5	24	16.6375	2.4	24	9.5875	0.4
25	22.3333	4	25	16.575	0	25	17.7125	0.7	25	11.0125	8	25	10.7375	0
26	20.2857	0	26	16.2875	0.2	26	18.475	0	26	11.25	2.2	26	12.2125	0
27	5.9		27	16.3375	17.2	27	21.825	0	27	11.6625	0.7	27	13.0125	0
28	13.75	0	28	16.6375	26.4	28	19.125	0	28	13.5875	0.9	28	13.05	0.2
29	10.275	0	29	18.6	3.4	29	19.6375	0	29	12.875	0.6	29	8.4875	0
30	7.4625	0	30	21.025	0	30	18.975	4	30	12.85	0.3	30	10.425	0.2
31	12.5714	0.1	31			31	13.6125	8	31	10.7375	2.3	31
среднее	12.8548	12.3		16.7454	88.8		19.7993	102.8		16.8299	127.1		10.434	30.2
2019
May			June			July			August			September
Days	Temperature, °C	Rainfall, mm	Days	Temperature, °C	Rainfall, mm	Days	Temperature, °C	Rainfall, mm	Days	Temperature, °C	Rainfall, mm	Days	Temperature, °C	Rainfall, mm
	average			average			average			average			average
1	-2.05714	3.1	1	19.7125	2	1	16.28		1	25.225	0	1	9.375	0
2	2.975		2	17.4833	2	2	19.34	0	2	19.65	6	2	8.975	1.4
3	7.03333		3	18.7	0.5	3	16.5833	5	3	18.525	0	3	8.8125	3
4	10.8286		4	16.8833	0.5	4	17.2125	5.4	4	18.95	0	4	11.9375	3.2
5	12.2429		5	12.1	2.7	5	19.7	0.4	5	20.875	0.2	5	11.175	9.8
6	14.775		6	8.8875	6.7	6	22.1833		6	25.9125	0	6	10.775	10.2
7	18.9		7	13.25	6.7	7	18.9143		7	22.9	0	7	11.2	13.4
8	18.8375		8	13.3875	5.5	8	21.5125		8	17.0125	0	8	10.325	18
9	19.65		9	12.3875	1.4	9	21.0286		9	15.375	0	9	11.4857	0.9
10	19.95		10	15.6625	1.3	10	23.55		10	17.7875	0	10	12.2875	0.7
11	18.0571		11	19.925		11	24.95		11	23.75	0	11	11.25	0.2
12	17.125		12	19.975		12	29.4333		12	24.8375	0	12	10.4	0
13	13.8714	0.2	13	20.7875		13	27.7667		13	22.35	0	13	13.5875	0
14	11.4375		14	13.0571	8	14	28.6333		14	18.425	0	14	12.325	0
15	3.2625	0.5	15	11.525	0.2	15	29.2		15	15.4125	0	15	14.0625	1
16	6.3875		16	12.6		16	33.0333		16	17.3	1	16	14.675	0
17	11.1375		17	14.775		17	27		17	17.9875	2	17	14.2875	0
18	11.35	8	18	12.775	38.5	18	27.3667		18	20.275	0.2	18	17.5	0
19	10.05	8	19	13.275	2.16667	19	29.4		19	20.8875	2	19	19.8875	0.2
20	7.875	1	20	16.2125	0.2	20	28.7333		20	18.0125	0	20	13.3375	0
21	6.03333	1	21	18.9875		21	30.7		21	16.0286	4	21	10.525	0
22	6.14		22	18.0625		22	25		22	13.8571	20	22	18.95	0
23	10.6143	0.1	23	13.625	0.2	23	25		23	16.5143	0.2	23	9.9	1
24	15.9667	0.2	24	17.9375	16	24	22.9		24	18.15	0.2	24	8.225	0
25	15		25	21.8875	4	25	23.5		25	18.925	0	25	4.6875	0
26	6.6	0.2	26	23.625		26	19.5667	0	26	22.55	0	26	3.64286	0
27	11.9		27	14.3	4.1	27	17.425	0	27	13.9	103	27	4.5375	16
28	19.1333		28	12.4143	0.3	28	21.9125	0	28	12.175	102	28	4.17143	6
29	20.375		29	15.475		29	24.0714	0	29	17.8125	0	29	3.64286	0.8
30	18	2.1	30	17.45		30	21.2625	1	30	12.1875	6	30	1.97143	53.7
31	17.8875	0.1	31			31	24.7625	0	31	9.8	4	31
2020
May			June			July			August			September
Days	Temperature, °C	Rainfall, mm	Days	Temperature, °C	Rainfall, mm	Days	Temperature, °C	Rainfall, mm	Days	Temperature, °C	Rainfall, mm	Days	Temperature, °C	Rainfall, mm
	average			average			average			average			average
1	13.8	0	1	24.1714	0.9	1	18.2	0	1			1	20.5625	0
2	15.3714	0.2	2	22.1	0	2	20.5667	23	2			2	22.1375	0
3	13.6571	0	3	16.1714	0	3	15.8375	15	3	29.15	0	3	14.25	2
4	6.5	0.1	4	13.525	53.2	4	18.1857	9.8	4	22.9625	0	4	8.55	2
5	6.3625	0.1	5	12.1875	53	5	19.4125	0	5	23.1375	0	5	8.3375	0
6	10.1143	0	6	15.2875	0	6	20.2714	0	6	22.6375	0	6	9.05	0
7	14.4571	0	7	18.5875	0	7	20.7429	0.1	7	25.0167	0	7	9.3375	0
8	17.8143	0	8	22.8	0	8	20.7969	0.1	8	21.475	0	8	7.95	0
9	19.1714	0	9	21.8875	0	9	23.075	0	9	21.9429	2	9	9.47969	0
10	19.3625	0	10	21.6875	0	10	22.1687	6	10	20	13.8	10	9.9375	0
11	18.9571	0.2	11	24.1857	0	11	20.55	3	11	15.7571	17	11	12	156
12	28.6	0	12	25.4571	0	12	24.15	0	12	16.15	7.3	12	15.0375	50
13	24.25	0	13	25.9143	0.1	13	21.1	0	13	15.125	0.3	13	15.225
14	24.1333	0	14	17.9	0	14	22.75	0	14	15.7375	0	14	16.925
15	14.4875	1.2	15	13.1375	0	15	23.3125	0	15	16.8625	0	15	15.475	5
16	17.525	2.7	16	15.45	8	16	22.6	0	16	16.8375	0.3	16	9.9875
17	18.0429	0.1	17	17.175	0	17	24.6375	0	17	17.3	6.3	17	7.975	1.8
18	19.1333	0.6	18	17.7	4	18	27.425	0	18	14.85	0	18	10.175	1
19	13.925	1.6	19	12.0571	4	19	25.6857	0	19	13.3	3	19	12.1625
20	13.3286	0.4	20	11.4875	0	20	23.3	11	20	13.4625	1	20	14.825
21	12.2857	0.8	21	17.9	0	21	19.9625	24	21	12.75	2	21	9.55
22	14.98	0	22	22.5857	0	22	17.9875	13	22	14.0875	0.7	22	6.0875	1.2
23	18.6	0.1	23	19.8875	0	23	20.3833	0.5	23	12.6563	0.7	23	6.1125	20
24	27.95	0	24	17.2625	0	24	19.1	4.9	24	14.05	0	24	5.56667	21
25	29.4	0	25	20.1375	0	25	17.675	18	25	15.0375	0	25	5.725	2
26	26.95	0	26	16.3875	3	26	17.475	11	26	16.2875	0	26	7.8
27	15.8875	0	27	11.2125	71	27	18.0625	4.3	27	16.5625	0	27	5.8625
28	18.1714	0.2	28	13.7875	23.6	28	17.8625	0.3	28	15.5375	0	28	5.72857
29	20.6625	0	29	16.6667	4	29	17.125		29	19.8375	0.3	29	8.8875
30	19.9875	1.1	30	19.5714	0.4	30	18.6857		30	20.575	0.3	30	3.9875	47
31	26.0167	0	31			31	21.5		31	20.2	0	31
