# Supplementary material for: Genome-wide association study of yield components in spring wheat collection harvested under two water regimes in Northern Kazakhstan
Source: PeerJ. 2021 Jul 27;9:e11857. doi: 10.7717/peerj.11857 (PMC8323601; doi:10.7717/peerj.11857)
Supplement: Supplemental Information 5 [file peerj-09-11857-s005.xlsx]

## Sheet: Figure S3
Dataset 1. Manhattan plot and QQ plot for nine studied traits identified using 179 spring wheat accessions tested under irrigated and rainfed conditions of Northern Kazakhstan (2018,2019,2020)
Trait	Graph (Manhattan plot)
condition	irrigated																																rainfed
HD
SMD
PH
PL
NPS
SL
NKS
TKW
YM2
