# Supplementary material for: Genome-wide association study of yield components in spring wheat collection harvested under two water regimes in Northern Kazakhstan
Source: PeerJ. 2021 Jul 27;9:e11857. doi: 10.7717/peerj.11857 (PMC8323601; doi:10.7717/peerj.11857)
Supplement: Supplemental Information 6 [file peerj-09-11857-s006.xlsx]

## Sheet: Table S1
Table S1. List of common wheat cultivars and breeding lines used in the currient study
COMMON WHEAT CULTIVARS OFFICIALLY APPROVED FOR THE USE ON THE TERRITORY OF KAZAKHSTAN
#	ID	Cultivar name	Country of origin
1	WKZ_01	Avangard	Kazakhstan
2	WKZ_02	Akmola 2	Kazakhstan
3	WKZ_03	Aktyube 39	Kazakhstan
4	WKZ_05	Almaken	Kazakhstan
5	WKZ_06	Altay	Kazakhstan
6	WKZ_07	Altayskaya 110	Russia
7	WKZ_08	Altayskaya 325	Russia
8	WKZ_09	Altayskaya 98	Kazakhstan
9	WKZ_10	Altayskaya stepnaya	Russia
10	WKZ_11	Albidum 188	Russia
11	WKZ_12	Arai	Kazakhstan
12	WKZ_13	Astana	Kazakhstan
13	WKZ_14	Astana 2	Kazakhstan
14	WKZ_15	Baiterek	Kazakhstan
15	WKZ_16	Vera	Russia
16	WKZ_17	Volgouralskaya	Russia
17	WKZ_18	Darina	Kazakhstan
18	WKZ_19	Dauyl	Kazakhstan
19	WKZ_20	Ertys 7	Kazakhstan
20	WKZ_21	Ertys-97	Kazakhstan
21	WKZ_22	Zhenis	Kazakhstan
22	WKZ_23	Zaulbinka	Kazakhstan
23	WKZ_24	Kazakhstankaya 15	Kazakhstan
24	WKZ_25	Kazakhstankaya 25	Kazakhstan
25	WKZ_26	Kazakhstankaya 4	Kazakhstan
26	WKZ_27	Kazakhstankaya rannespelaya	Kazakhstan
27	WKZ_28	Karabalykskaya 2	Kazakhstan
28	WKZ_29	Karabalykskaya 25	Kazakhstan
29	WKZ_30	Karabalykskaya 3	Kazakhstan
30	WKZ_31	Karabalykskaya 9	Kazakhstan
31	WKZ_32	Karabalykskaya 90	Kazakhstan
32	WKZ_33	Karabalykskaya 92	Kazakhstan
33	WKZ_34	Karagandinskaya 22	Kazakhstan
34	WKZ_35	Karagandinskaya 25	Kazakhstan
35	WKZ_36	Karagandinskaya 29	Kazakhstan
36	WKZ_37	Omskaya 28	Russia
37	WKZ_38	Kazragandinskaya 70	Kazakhstan
38	WKZ_39	Kenzhegali	Kazakhstan
39	WKZ_40	Oral	Kazakhstan
40	WKZ_41	Kutulukskaya	Russia
41	WKZ_42	Lyubava	Kazakhstan
42	WKZ_43	Lutescens 32	Kazakhstan
43	WKZ_44	Lutescens 5	Kazakhstan
44	WKZ_45	Lutescens 521	Russia
45	WKZ_46	Lutescens 90	Kazakhstan
46	WKZ_47	Lyazzat	Kazakhstan
47	WKZ_48	Miras	Kazakhstan
48	WKZ_49	Nadezhda	Kazakhstan
49	WKZ_51	Niva 2	Russia
50	WKZ_53	Omskaya 19	Russia
51	WKZ_54	Omskaya 20	Russia
52	WKZ_55	Omskaya 24	Russia
53	WKZ_56	Omskaya 28	Russia
54	WKZ_57	Omskaya 29	Russia
55	WKZ_58	Omskaya 30-1	Russia
56	WKZ_59	Omskaya 35	Russia
57	WKZ_60	Omskaya 36	Russia
58	WKZ_62	Pavlodarskaya 93	Kazakhstan
59	WKZ_63	Karagandinskaya 30	Kazakhstan
60	WKZ_64	Pamyati Azieva	Russia
61	WKZ_65	Omskaya 30-2	Russia
62	WKZ_66	Rosinka 3	Russia
63	WKZ_67	Samad	Kazakhstan
64	WKZ_68	Samgau	Kazakhstan
65	WKZ_69	Saratovskaya29	Russia
66	WKZ_70	Saratovskaya42	Russia
67	WKZ_71	Saratovskaya55	Russia
68	WKZ_72	Saratovskaya56	Russia
69	WKZ_73	Saratovskaya58	Russia
70	WKZ_74	Saratovskaya60	Russia
71	WKZ_75	Saratovskaya66	Russia
72	WKZ_76	Saratovskaya Yugo-Vostochanya	Russia
73	WKZ_77	Severyanka	Kazakhstan
74	WKZ_78	Seke	Kazakhstan
75	WKZ_79	Nargiz	Kazakhstan
76	WKZ_80	Stepnaya 1	Kazakhstan
77	WKZ_81	Ulbinka 25	Kazakhstan
78	WKZ_82	Tselina 50	Kazakhstan
79	WKZ_83	Tselinnaya 24	Kazakhstan
80	WKZ_84	Tselinnaya 26	Kazakhstan
81	WKZ_85	Tselinnaya 3С	Kazakhstan
82	WKZ_86	Tselinnaya yubileynaya	Kazakhstan
83	WKZ_87	Shortandinskaya 2007	Kazakhstan
84	WKZ_88	Shortandinskaya 95 uluchshennaya	Kazakhstan
85	WKZ_89	Eritrospermum 35	Kazakhstan
86	WKZ_90	Yugo-Vostochnaya 2	Russia
87	WKZ_91	Yugo-Vostochnaya 3	Russia
88	WKZ_92	Kazakhstan 20	Kazakhstan
89	WKZ_93	Altayskaya 50	Russia
90	WKZ_94	Altayskaya 100	Russia
91	WKZ_95	Korneevka	Kazakhstan
92	WKZ_96	Chernyava 13	Russia
CULTIVARS AND BREEDING LINES OF COMMON WHEAT OBTAINED FROM A.I. BARAYEV SCIENTIFIC - PRODUCTION CENTER FOR GRAIN FARMING (SPCGF, KAZAKHSTAN)
#	ID	Cultivar/line name	Country of origin
1	WS_01	Shortandinskaya yubileynaya * 53 s/11	Kazakhstan
2	WS_02	L194 * Skala BR	Kazakhstan
3	WS_05	Neepawa * Tselin 20	Kazakhstan
4	WS_06	Duet * 101/94 - 1	Kazakhstan
5	WS_07	Saratovskaya 66 * Spika	Kazakhstan
6	WS_08	Tselin 90 * Tauelsіzdіk 20	Kazakhstan
7	WS_09	Omskaya 30 * Akmola 2	Kazakhstan
8	WS_10	Shortandinskaya yubileynaya * Angara 86	Kazakhstan
9	WS_12	157/98 * Rosinka 3	Kazakhstan
10	WS_13	176/95 - 1 * Lyut 268	Kazakhstan
11	WS_14	Duet * Shortandinskaya 95 uluchshennaya	Kazakhstan
12	WS_16	Shortandinskaya 95 uluchshennaya*131/5 - 132/4	Kazakhstan
13	WS_17	Bayterek * Oral	Kazakhstan
14	WS_18	Oral * Svetlanka	Kazakhstan
15	WS_19	WW 1615 * Tselinnaya yubileynaya	Kazakhstan
16	WS_20	133/3 - 133/6 * Tselinnaya yubileynaya	Kazakhstan
17	WS_21	Rosinka 3 * Fora	Kazakhstan
18	WS_22	Эритр 893 * Tselinogradka	Kazakhstan
19	WS_23	Bow/Pri/Bue/3/Wh57 * Astana	Kazakhstan
20	WS_24	Tselin 2007 * Oral	Kazakhstan
21	WS_25	Novosibirsk 18 * Akmola 2	Kazakhstan
22	WS_26	Akmola 2 * Kulm	Kazakhstan
23	WS_27	Karabalykskaya 98 * Akmola 40	Kazakhstan
24	WS_28	Tselinа 50 * SAD-101	Kazakhstan
25	WS_29	Teo * Col 4303 * Ishim 98	Kazakhstan
26	WS_30	334/07 * AC Barrie	Kazakhstan
27	WS_31	Omskaya 35 * Lyut 268	Kazakhstan
28	WS_32	Shortandinskaya 2007 * SAD-114	Kazakhstan
29	WS_33	67/98 * Chebarkulskaya	Kazakhstan
30	WS_34	Bayterek * Akmola 40	Kazakhstan
31	WS_36	Dunlop * Lyut 3	Kazakhstan
32	WS_37	359/07 * Akmola 2	Kazakhstan
33	WS_38	Akmola 3 * Omskayaская 36	Kazakhstan
34	WS_39	Tselin 21 * Yertis 97	Kazakhstan
35	WS_40	345/07 * Astana	Kazakhstan
36	WS_41	40/5 * Novosibirsk 15	Kazakhstan
37	WS_42	Tselin 90 * Tselinоградка	Kazakhstan
38	WS_44	Shortandinskaya 95 uluchshennaya * PVN/Bonl/Milan	Kazakhstan
39	WS_45	176/95-1 * Karabalykskaya 90	Kazakhstan
40	WS_46	Lyut 1300 * 67/98	Kazakhstan
41	WS_48	Astana * Novosibirsk 15	Kazakhstan
42	WS_50	Tselin 24 * Rosinka 3	Kazakhstan
43	WS_51	Shortandinskaya 2007 * Novosibirsk 15	Kazakhstan
44	WS_53	Kaz.ran*Lyut 268	Kazakhstan
45	WS_54	Shortandinskaya 2007*Tselin 90	Kazakhstan
46	WS_55	Skala*Akmola 3	Kazakhstan
47	WS_57	Katyusha* Saratovskayaов 42	Kazakhstan
48	WS_58	Omskaya30*Karabalykskaya 90	Kazakhstan
49	WS_59	Asyl Sapa * Tselinnaya yubileynaya	Kazakhstan
50	WS_60	Astana * Laura	Kazakhstan
51	WS_61	Karabalykskaya 85 * Lyut 644	Kazakhstan
52	WS_62	67/98*Shortandinskaya 95 uluchshennaya	Kazakhstan
53	WS_64	Kenzhegali * АНК 113	Kazakhstan
54	WS_65	Dostyk * Tauelsіzdіk 20	Kazakhstan
55	WS_66	106/94* Ishim 92	Kazakhstan
56	WS_68	Astana 2 * Omskaya21	Kazakhstan
57	WS_69	Stepnaya 16* Omskaya21	Kazakhstan
58	WS_70	Saratovskaya 55 * Gerakl	Kazakhstan
59	WS_71	Tselin 20 * Saratovskaya 66	Kazakhstan
60	WS_72	Oral * Pirotriks 28	Kazakhstan
61	WS_73	300/07 * Neepawa	Kazakhstan
62	WS_75	Saratovskaya 66 * Bagansk 95	Kazakhstan
63	WS_76	Shortandinskaya 95 uluchshennaya * Skauz/2*Star	Kazakhstan
64	WS_77	Karabalykskaya 90 * Akmola 40	Kazakhstan
65	WS_78	Snegurka * Kaz.ran	Kazakhstan
66	WS_79	Bentana 48 * W 16151	Kazakhstan
67	WS_80	Akm. Niva * Yertis	Kazakhstan
68	WS_81	Ак 2 * Bow(prl)blu 3/wh 57)	Kazakhstan
69	WS_82	Astana 2 * Saratovskaya 64	Kazakhstan
70	WS_83	Akmolinka* Kaz.ran	Kazakhstan
71	WS_84	Akmola 2 * НКС	Kazakhstan
72	WS_85	Lyut 268* Sawsn 125	Kazakhstan
73	WS_86	Tselin 21 * Omskaya33	Kazakhstan
74	WS_87	Oral * Laura	Kazakhstan
75	WS_89	SH 2012 * Moran	Kazakhstan
76	WS_91	40/5 * Tselin 26	Kazakhstan
77	WS_92	Kenzhegali * Tselin 21	Kazakhstan
78	WS_93	Katyusha* Karabalykskaya 7	Kazakhstan
79	WS_94	Akm. Niva * Blue Ribbou	Kazakhstan
80	WS_95	Hybrid 428010 * Fora	Kazakhstan
81	WS_96	SAWSN * Saratovskaya 62	Kazakhstan
82	WS_97	Tselin 21 * Karabalykskaya 2	Kazakhstan
83	WS_98	13/97 * Astana	Kazakhstan
84	WS_99	Grekum 114 * Shortandinskaya 95 uluchshennaya	Kazakhstan
85	WS_100	Akmola 2	Kazakhstan
86	WS_101	Astana	Kazakhstan
87	WS_102	Tselinnaya yubileynaya	Kazakhstan
