# Supplementary material for: Genome-wide association study of yield components in spring wheat collection harvested under two water regimes in Northern Kazakhstan
Source: PeerJ. 2021 Jul 27;9:e11857. doi: 10.7717/peerj.11857 (PMC8323601; doi:10.7717/peerj.11857)
Supplement: Supplemental Information 7 [file peerj-09-11857-s007.xlsx]

## Sheet: Table S2 
Table S2. GWAS results for nine studied traits identified using 179 spring wheat accessions tested under irrigated and rainfed conditions of Northern Kazakhstan (2018- 2020)
№	trait	trait	SNP	Chr	Pos	p-value	R2	irrigated				rainfed
								2018	2019	2020	average	2018	2019	2020	average
1	HD	heading date	Kukri_c39223_871	1B	75.6	0.000377493	0.07580337908573842					0.000456641		0.000377493
2	HD	heading date	Excalibur_c54055_694	1D	81.1	0.000763187	0.06796117699069691							0.000763187
3	HD	heading date	BS00063511_51	1D	167.1	7.65608e-05	0.0886933					7.65608e-05
4	HD	heading date	Excalibur_c7136_1260	2A	44.5	0.000307149	0.07843266923499749			0.000307149
5	HD	heading date	wsnp_Ex_rep_c101866_87158671	2A	101.9	0.000375877	0.0710908					0.000375877
6	HD	heading date	RAC875_c1706_1888	2A	151.2	0.000333174	0.0772334		0.000333174				0.000640802		0.000878316
7	HD	heading date	Excalibur_c20376_615	2B	76.8	6.54162e-05	0.0696094	0.000704046				6.54162e-05			0.000816657
8	HD	heading date	GENE-0581_156	2B	81.7	0.000589254	0.07220218650775104			0.000589254
9	HD	heading date	D_GB5Y7FA01EHPZX_186	2D	50.8	0.00014079	0.0865531	0.00014079
10	HD	heading date	BS00050109_51	3A	120.2	0.000800541	0.0697582	0.000800541
11	HD	heading date	wsnp_Ex_c8240_13914674	3B	32.9	1.48884e-06	0.142809		0.000833096	0.000357585	0.000286474		1.48884e-06	0.000152058	1.65737e-06
12	HD	heading date	IMX3190	3B	56.6	0.00087321	0.0661332455729553							0.00087321
13	HD	heading date	BobWhite_c5095_634	3B	69.7	0.00087321	0.0661332455729553							0.00087321
14	HD	heading date	BS00078844_51	3B	85	0.000388596	0.07546637153612669							0.000388596
15	HD	heading date	RAC875_c11702_1015	4A	161.8	0.000948873	0.0683972						0.000948873
16	HD	heading date	BobWhite_c10385_374	5A	0	1.56751e-05	0.10131630713400586			4.52883e-05				1.56751e-05	0.000137878
17	HD	heading date	wsnp_BF293620A_Ta_2_1	5A	58.27	1.94394e-05	0.11164428757954854			1.94394e-05	0.000716769			0.000262824
18	HD	heading date	BS00022071_51	5A	90.5	4.88778e-05	0.10032321223971007			4.88778e-05	0.00056634			0.000386943	0.000722402
19	HD	heading date	RAC875_rep_c112818_307	5A	98.9	0.000349852	0.0738766					0.000349852
20	HD	heading date	wsnp_Ku_c6977_12078791	5A	127.2	0.000904131	0.06591384280419081							0.000904131
21	HD	heading date	RAC875_rep_c109634_90	5B	125	0.000345435	0.07710912940936156							0.000345435	0.000456613
22	HD	heading date	Kukri_c36018_985	5B	134.1	0.000556045	0.071498092406592							0.000556045
23	HD	heading date	TA003709-0269	5D	153.8	0.000556034	0.07149832621440053							0.000556034
24	HD	heading date	Excalibur_c28854_1580	6A	0.88	1.93972e-06	0.14028222820040637							1.93972e-06	0.000666516
25	HD	heading date	RAC875_c13610_1599	6B	0.37	3.75674e-05	0.10320887816444063	0.000715002			0.000767698			3.75674e-05	0.000977652
26	HD	heading date	Excalibur_rep_c106566_371	6D	2.56	8.82015e-06	0.12096587984707627							8.82015e-06	0.000739222
27	SMD	seed maturity date	Jagger_c5280_407	1A	77.7	0.000485608	0.06881834705464206				0.000485608
28	SMD	seed maturity date	Excalibur_c14911_976	1B	0	0.000781686	0.0661762		0.000781686
29	SMD	seed maturity date	BS00022176_51	1B	108	0.000235556	0.0801918	0.000235556
30	SMD	seed maturity date	Excalibur_c16851_142	1D	32.9	0.000658926	0.06911785159970127							0.000658926
31	SMD	seed maturity date	RAC875_rep_c105196_532	1D	55.1	0.000444453	0.07364812102807713							0.000444453
32	SMD	seed maturity date	Excalibur_c54055_694	1D	81.1	0.000304625	0.07806989959383533							0.000304625
33	SMD	seed maturity date	Tdurum_contig46389_1540	1D	178.2	0.000425596	0.0745469					0.000621171
34	SMD	seed maturity date	RAC875_c11652_544	2A	18.1	0.000921218	0.06529187327605417							0.000921218
35	SMD	seed maturity date	BobWhite_c2022_245	2A	53.1	0.00061471	0.06998602188824153							0.00061471
36	SMD	seed maturity date	RAC875_c57998_165	2A	101.9	0.000323181	0.0834036	0.000323181			0.000990114
37	SMD	seed maturity date	BS00065366_51	2A	135.3	0.000610618	0.0700009	0.000610618
38	SMD	seed maturity date	wsnp_Ex_c34303_42642389	2B	0	0.000362609	0.07540279042908837			0.000362609
39	SMD	seed maturity date	Kukri_c9785_1472	2B	75.7	0.000373631	0.0780856	0.000373631				0.000522927
40	SMD	seed maturity date	CAP8_c5161_541	2B	107.5	0.000206769	0.0830425			0.00070309		0.000662317	0.000207363
41	SMD	seed maturity date	wsnp_Ex_c24711_33964543	2B	243.2	0.000722803	0.0721898					0.000722803
42	SMD	seed maturity date	GENE-0609_166	2D	76.5	0.000621939	0.0746482					0.000621939
43	SMD	seed maturity date	Excalibur_c23239_961	2D	129	0.00015759	0.0848606	0.00015759			0.000837486
44	SMD	seed maturity date	Tdurum_contig46389_1459	3B	43.3	0.000621171	0.0694015					0.000621171
45	SMD	seed maturity date	IMX3190	3B	56.6	0.000504903	0.07217699979202996							0.000504903	0.000652306
46	SMD	seed maturity date	BobWhite_c5095_634	3B	69.7	0.000504903	0.07217699979202996							0.000504903	0.000652306
47	SMD	seed maturity date	BS00078844_51	3B	85	5.00189e-06	0.1275753306665346							5.00189e-06	0.000321696
48	SMD	seed maturity date	BS00038349_51	3B	98.1	0.000346314	0.07653712963926272							0.000346314
49	SMD	seed maturity date	GENE-1805_65	3D	71.9	0.000663318	0.06904173229278147							0.000663318	0.000725602
50	SMD	seed maturity date	Tdurum_contig61601_447	3D	130.4	0.000346314	0.07653712783357212							0.000346314
51	SMD	seed maturity date	RAC875_c40654_206	4A	120.1	0.000176051	0.08287364638554413							0.000947676	0.000176051
52	SMD	seed maturity date	GENE-4759_699	4A	133.9	0.0003351	0.0761465	0.0003351
53	SMD	seed maturity date	BobWhite_c10385_374	5A	0	0.000902631	0.06500191230448563			0.000902631
54	SMD	seed maturity date	BS00082002_51	5A	55.1	0.000784224	0.06575750080861846								0.000784224
55	SMD	seed maturity date	RAC875_c30011_426	5B	100.9	0.000420835	0.07309071275987396								0.000420835
56	SMD	seed maturity date	Jagger_c8121_167	5B	165	0.000987578	0.06450111760227119							0.000987578
57	SMD	seed maturity date	Jagger_c8037_96	5D	167	6.62039e-06	0.1241742850682673							6.62039e-06	1.42549e-05
58	SMD	seed maturity date	Excalibur_c28854_1580	6A	0.88	0.000724931	0.06806015889982876							0.000724931
59	SMD	seed maturity date	BS00009985_51	6A	60.9	8.24785e-05	0.0935187743511957							8.24785e-05	0.000605746
60	SMD	seed maturity date	Tdurum_contig75700_411	6A	110.1	0.000675582	0.0690015417546297							0.000675582
61	SMD	seed maturity date	BS00004466_51	6A	128.1	0.000681382	0.06880540605008545							0.000681382
62	SMD	seed maturity date	Excalibur_c15744_322	6B	0.37	0.000866413	0.06599013806286384	0.0004236						0.000866413
63	SMD	seed maturity date	Excalibur_rep_c106566_371	6D	2.56	0.000707816	0.0682983486485813							0.000707816
64	SMD	seed maturity date	Jagger_c9314_100	7B	52.2	0.000176838	0.0836953314315926			0.000176838
65	SMD	seed maturity date	IAV3265	7D	118.6	0.000295255	0.07922784957967692							0.000295255
66	SMD	seed maturity date	TA001185-0966	7D	139.6	6.24765e-05	0.09684025388642484							6.24765e-05
67	PH	plant height	BS00055866_51	1B	86.7	0.000592948	0.07034052363183141							0.000592948
68	PH	plant height	RAC875_c17720_501	2B	39.5	0.000749739	0.07123647442731038							0.000749739
69	PH	plant height	wsnp_Ex_c1962_3696265	2B	66.2	0.000232884	0.0810104					0.000232884
70	PH	plant height	wsnp_Ra_c28955_38371323	2B	79.6	0.000529406	0.075977					0.000529406
71	PH	plant height	BS00064448_51	2B	94.8	0.000910108	0.0664203					0.000910108
72	PH	plant height	wsnp_Ex_c1758_3326792	2B	107	0.000487718	0.0770765					0.000487718
73	PH	plant height	wsnp_Ra_rep_c74497_72390803	2B	119.1	0.000782745	0.06725918084674654							0.000782745
74	PH	plant height	IAV1155	3A	5.8	0.000408237	0.0789082		0.000408237
75	PH	plant height	BS00022804_51	3A	69.7	0.00015818	0.0848224		0.00015818
76	PH	plant height	Excalibur_c5561_1013	3A	90.5	0.000970386	0.06448903431849007				0.000970386
77	PH	plant height	Excalibur_c10383_432	3D	0	0.000400922	0.076905		0.000440834
78	PH	plant height	wsnp_CAP11_rep_c4151_1963100	5A	52.7	0.000780933	0.0665486		0.000780933
79	PH	plant height	wsnp_Ex_c214_421541	5B	33	0.000286162	0.07926956689253258							0.000286162
80	PH	plant height	TA002756-0960	5B	97.9	0.000114968	0.0887223	0.000114968
81	PH	plant height	Kukri_c836_513	5B	134.1	0.000774226	0.06978976486743534				0.000774226
82	PH	plant height	RAC875_rep_c107081_918	6A	51.3	0.000895207	0.07207880621219556			0.000895207
83	PH	plant height	wsnp_Ex_rep_c101766_87073440	6A	123.4	0.000205758	0.0822106					0.000205758
84	PH	plant height	RAC875_c56259_87	6A	134.2	0.000154916	0.0892541					0.000154916
85	PH	plant height	BS00040814_51	6A	140.8	0.000274487	0.0815881					0.000274487
86	PH	plant height	BS00022137_51	7A	180.3	0.000917198	0.0647415	0.000917198
87	PH	plant height	BS00061593_51	7A	226.1	0.000998121	0.0635816	0.000998121
88	PL	peduncle length	CAP12_c8163_118	1A	131.5	0.00088139	0.0674923	0.00088139
89	PL	peduncle length	BS00078431_51	1B	70.8	4.48834e-05	0.102203		4.48834e-05
90	PL	peduncle length	BS00063511_51	1D	167.1	0.000293389	0.0755955		8.38209e-05
91	PL	peduncle length	wsnp_Ex_c34303_42642389	2B	0	0.000340035	0.0775932		0.000340035
92	PL	peduncle length	Excalibur_c20376_615	2B	76.8	1.92329e-05	0.112058		1.92329e-05
93	PL	peduncle length	TA004957-0405	2B	109.5	0.00071792	0.06816671141257746			0.00071792
94	PL	peduncle length	wsnp_Ra_c12935_20587578	3B	52.8	0.000275465	0.08480847460878477			0.000275465					0.000896834
95	PL	peduncle length	BS00030534_51	3B	67.4	0.000334408	0.07663301653313324			0.000334408					0.000683557
96	PL	peduncle length	Kukri_c5502_2513	4B	71.5	0.000943542	0.0627127	0.000943542
97	PL	peduncle length	Excalibur_rep_c115510_314	5A	35.4	0.000208197	0.0795465	0.000208197
98	PL	peduncle length	BS00040916_51	5A	49.6	0.000235479	0.0860231	0.000235479
99	PL	peduncle length	RAC875_rep_c112818_307	5A	98.9	2.20594e-05	0.111948		2.20594e-05
100	PL	peduncle length	RFL_Contig5787_2311	5A	115.3	0.000927406	0.0644395	0.000927406
101	PL	peduncle length	wsnp_Ex_rep_c68175_66950387	6A	31.8	0.000993922	0.067616		0.000993922
102	PL	peduncle length	Kukri_rep_c69627_954	6A	99.1	0.000486107	0.0841838					0.000486107
103	PL	peduncle length	Tdurum_contig569_263	6B	100.3	0.000873093	0.06700806588205857							0.000873093
104	PL	peduncle length	BS00022137_51	7A	180.3	0.000762474	0.0638377	0.000762474
105	PL	peduncle length	BS00061593_51	7A	226.1	0.000740667	0.0642129	0.000740667
106	NPS	number of productive spikes	BS00078431_51	1B	70.8	3.47143e-05	0.10754933884679489	0.000107472		3.47143e-05
107	NPS	number of productive spikes	BS00063511_51	1D	167.1	3.9333e-05	0.1024826445906984	0.000173205		3.9333e-05
108	NPS	number of productive spikes	Excalibur_c20376_615	2B	76.8	1.26304e-05	0.11633992319245219	2.9692e-05		1.26304e-05
109	NPS	number of productive spikes	RAC875_c103094_120	2B	87.5	0.000914763	0.0707289						0.000914763
110	NPS	number of productive spikes	wsnp_Ex_c2203_4129271	2B	114.3	0.000844432	0.0727206						0.000844432
111	NPS	number of productive spikes	Kukri_c10869_1591	2B	145.2	0.000176749	0.08492	0.000176749
112	NPS	number of productive spikes	GENE-0777_105	2D	82.8	0.000966611	0.06501143777804717							0.000966611
113	NPS	number of productive spikes	BS00022798_51	3A	23.6	0.00020031	0.0856446		0.00020031
114	NPS	number of productive spikes	wsnp_Ex_c18250_27065775	3D	40.5	0.00018676	0.0866029					0.00018676
115	NPS	number of productive spikes	BS00061125_51	3D	149.8	0.000654553	0.0694929	0.000654553
116	NPS	number of productive spikes	Ex_c7227_53	4A	37	0.00024758	0.08069437199963703			0.00024758
117	NPS	number of productive spikes	tplb0051b16_1324	4A	62.8	0.00044961	0.0717804		0.00044961
118	NPS	number of productive spikes	Excalibur_c27349_166	4B	77.9	0.000984745	0.07242117565892744			0.000984745
119	NPS	number of productive spikes	RAC875_rep_c105718_304	4D	47	8.39772e-05	0.10051652265777182			8.39772e-05
120	NPS	number of productive spikes	Jagger_c5915_58	5A	17.4	0.000127677	0.08838945319050664			0.000127677
121	NPS	number of productive spikes	RAC875_rep_c112818_307	5A	98.9	5.53429e-05	0.09860120183983193	3.40206e-05		5.53429e-05
122	NPS	number of productive spikes	RAC875_c29907_115	5B	14.7	0.000317747	0.07767608778114211			0.000317747
123	NPS	number of productive spikes	Jagger_c3991_101	5B	63.7	0.000143083	0.0846268		0.000143083
124	NPS	number of productive spikes	TA003021-1057	6A	56.1	0.000615866	0.0698549	0.000615866		0.000943497
125	NPS	number of productive spikes	Kukri_c37301_385	6A	140.8	0.000787637	0.0691867					0.000787637
126	NPS	number of productive spikes	wsnp_JD_c3225_4227048	7A	92.1	0.000388742	0.07539984348867908			0.000388742
127	NPS	number of productive spikes	TA003458-0086	7A	133.9	9.54034e-05	0.100902	0.000499294		9.54034e-05
128	NPS	number of productive spikes	RAC875_c18668_513	7A	241.4	0.000933545	0.0641477						0.000933545
129	NPS	number of productive spikes	TA005127-0595	7B	127.3	0.000670525	0.06903962839694386			0.000670525
130	SL	spike length	wsnp_Ku_c1818_3557408	1A	16.7	0.000781479	0.0664024		0.000930534				0.000781479
131	SL	spike length	Kukri_c29150_143	1A	29.1	0.000387904	0.0748729		0.000387904
132	SL	spike length	BobWhite_c26569_190	1A	111.5	0.000358343	0.0796172					0.000358343
133	SL	spike length	wsnp_Ex_c26419_35667216	1B	65.4	0.000599433	0.0739453		0.000599433					0.000986176
134	SL	spike length	Tdurum_contig46413_680	1D	20.6	0.000595556	0.0712919		0.000595556
135	SL	spike length	BS00063511_51	1D	167.1	0.000212319	0.08046150368781667							0.000212319
136	SL	spike length	wsnp_Ex_c42720_49228237	2A	104.1	9.29824e-05	0.09008478729723564								9.29824e-05
137	SL	spike length	Excalibur_c34964_326	2A	113.2	0.000708999	0.07524133682960249			0.000708999
138	SL	spike length	Ku_c77612_301	2B	77.6	0.000613853	0.06865409709518468							0.000613853
139	SL	spike length	BS00093993_51	2B	108.3	5.63561e-06	0.12354		1.68445e-05		9.53532e-06	0.000339769			0.000750007
140	SL	spike length	GENE-0777_105	2D	82.8	0.000302587	0.07875114356496181							0.000302587
141	SL	spike length	TA001453-0801	2D	96.1	0.000311335	0.0772876				0.000632282		0.000314597
142	SL	spike length	Tdurum_contig777_260	3A	20.7	0.00045563	0.0733906					0.00045563
143	SL	spike length	wsnp_Ex_c8240_13914674	3B	32.9	0.000228931	0.0794055637213848				0.000228931
144	SL	spike length	Kukri_c48750_1416	3B	61.8	0.000859353	0.0646541282626793				0.000859353
145	SL	spike length	BS00045502_51	3D	4.8	0.000922793	0.0694561					0.000922793
146	SL	spike length	Excalibur_c61788_536	4A	47.5	0.000342178	0.0763212		0.000342178
147	SL	spike length	Ra_c64313_1337	4A	61.2	0.000260771	0.0790722		0.000260771
148	SL	spike length	BS00109052_51	5A	49.7	0.000658365	0.0685633	0.000658365
149	SL	spike length	wsnp_Ku_c64203_64579087	5B	5.7	3.50019e-05	0.10286573766005033			3.50019e-05
150	SL	spike length	Tdurum_contig25432_1377	5B	19.6	0.000116576	0.09103948721753158			0.000116576
151	SL	spike length	RFL_Contig5739_1542	5B	78.4	0.000600105	0.0703969						0.000600105
152	SL	spike length	Excalibur_c9391_1016	5B	109.5	0.000155428	0.0859064				0.000480425		0.000155428
153	SL	spike length	Tdurum_contig46670_911	6A	128.2	0.000864471	0.06443466993008225				0.000864471
154	SL	spike length	RAC875_c26860_648	6B	28.4	0.000520715	0.0858971	0.000520715
155	SL	spike length	Jagger_c556_473	6B	64.8	0.000445962	0.07201467926075746							0.000445962
156	SL	spike length	D_contig09096_210	6B	81.6	0.000963084	0.0642576	0.000963084
157	SL	spike length	RAC875_c41613_124	6D	81.6	0.000946768	0.0647938	0.000946768
158	SL	spike length	TA003458-0086	7A	133.9	0.000699865	0.06694554667498864							0.000699865
159	SL	spike length	Jagger_c9314_100	7B	52.2	3.42755e-05	0.10170293322721763							3.42755e-05
160	SL	spike length	Ra_c63534_581	7D	68.1	0.000878802	0.0653112	0.000878802
161	NKS	number of kernels per spike	Kukri_c13107_100	1A	72.9	0.000485576	0.0724727						0.000485576
162	NKS	number of kernels per spike	wsnp_Ex_c1997_3757721	1A	87.8	0.000758123	0.0692898						0.000758123
163	NKS	number of kernels per spike	BS00078431_51	1B	70.8	0.000346685	0.0837001	0.000346685
164	NKS	number of kernels per spike	GENE-0371_208	1B	111.1	0.000800895	0.0665484	0.000800895
165	NKS	number of kernels per spike	Excalibur_rep_c67747_629	1D	114.5	0.000800895	0.0665484	0.000800895
166	NKS	number of kernels per spike	CAP12_rep_c6956_169	2A	115.2	0.000782388	0.0668162					0.000782388
167	NKS	number of kernels per spike	Ku_c77612_301	2B	77.6	8.27324e-05	0.09327641398388069	0.000831414						8.27324e-05
168	NKS	number of kernels per spike	Excalibur_c5801_177	2B	115.8	0.000713585	0.073585					0.000713585
169	NKS	number of kernels per spike	Excalibur_c65796_394	2D	71.2	0.00032408	0.0942366					0.00032408
170	NKS	number of kernels per spike	wsnp_Ex_c8240_13914674	3B	32.9	3.83733e-07	0.147553	5.46967e-05	0.000255501		3.83733e-07
171	NKS	number of kernels per spike	Tdurum_contig100004_204	3B	79.8	0.000725553	0.0674421					0.000725553
172	NKS	number of kernels per spike	BS00068556_51	3B	91.5	0.000725667	0.0674883					0.000725667
173	NKS	number of kernels per spike	BS00072157_51	4A	100.3	0.000978885	0.06393891319018012							0.000978885
174	NKS	number of kernels per spike	wsnp_JD_c27162_22206547	4A	120.4	0.000131136	0.0869173689582135							0.000131136
175	NKS	number of kernels per spike	GENE-4759_699	4A	133.9	0.000986997	0.100049						0.000986997
176	NKS	number of kernels per spike	RAC875_c5834_235	4A	155.5	0.000296248	0.0776344120982026							0.000296248
177	NKS	number of kernels per spike	Excalibur_c56798_364	4A	164.1	0.000188592	0.08335839379739594							0.000188592
178	NKS	number of kernels per spike	RAC875_c5087_310	4B	71.3	0.000328278	0.0879802		0.00074308						0.000184268
179	NKS	number of kernels per spike	tplb0029e02_1186	5A	11	0.000445596	0.07305902892881452				0.000445596
180	NKS	number of kernels per spike	BS00077990_51	5A	43.2	0.000846048	0.06568571453345046				0.000846048
181	NKS	number of kernels per spike	wsnp_BF293620A_Ta_2_1	5A	58.27	0.000469467	0.07236884150266952							0.000469467
182	NKS	number of kernels per spike	RAC875_rep_c116420_103	5A	89.9	0.000672976	0.06809621059008931							0.000672976
183	NKS	number of kernels per spike	RAC875_c30011_426	5B	100.9	0.000639443	0.07255673412390166							0.000639443
184	NKS	number of kernels per spike	Kukri_c27433_1819	5B	150.9	0.000532602	0.0718912		0.000532602
185	NKS	number of kernels per spike	Excalibur_c29639_65	6A	119.5	0.000583557	0.0705892						0.000807649
186	NKS	number of kernels per spike	Tdurum_contig46670_911	6A	128.2	0.000639547	0.06885553917537707				0.000639547
187	NKS	number of kernels per spike	Excalibur_c35713_106	6B	46.9	0.000971706	0.07159						0.000971706
188	NKS	number of kernels per spike	RAC875_c22210_191	7A	42.1	0.000989044	0.0641581	0.000989044
189	NKS	number of kernels per spike	RAC875_c8842_724	7A	90.7	0.000904156	0.065648431005682				0.000904156
190	NKS	number of kernels per spike	RAC875_c11283_722	7A	157.3	0.000240554	0.08006750966837223							0.000240554
191	NKS	number of kernels per spike	wsnp_Ex_c31955_40681185	7A	216.2	0.000117622	0.08841282016676968							0.000117622
192	NKS	number of kernels per spike	wsnp_Ex_c10024_16489505	7D	191.2	0.000240554	0.08006748888546124							0.000240554
193	TKW	thousand kernels weight	BS00078431_51	1B	70.8	2.75488e-06	0.135988		2.75488e-06			7.99655e-06		0.000744667	0.000988159
194	TKW	thousand kernels weight	wsnp_Ex_rep_c101231_86636951	1B	81.6	0.000654595	0.067473					0.000654595
195	TKW	thousand kernels weight	BS00063511_51	1D	167.1	0.000134803	0.102921		3.63758e-05			0.000134803
196	TKW	thousand kernels weight	wsnp_Ex_rep_c101866_87158671	2A	101.9	0.000296217	0.0735213		0.000440456			0.000296217
197	TKW	thousand kernels weight	BS00067907_51	2A	132.7	0.000114776	0.089213		0.000114776
198	TKW	thousand kernels weight	RFL_Contig927_1591	2A	143.6	0.00027333	0.0775026					0.00027333
199	TKW	thousand kernels weight	wsnp_Ex_c34303_42642389	2B	0	0.000308532	0.0759631					0.000308532
200	TKW	thousand kernels weight	Excalibur_c20376_615	2B	76.8	1.97521e-06	0.138814		1.97521e-06			2.10783e-06			0.000553942
201	TKW	thousand kernels weight	Ku_c12037_482	2B	106.5	0.000141558	0.0870723						0.000141558
202	TKW	thousand kernels weight	Excalibur_c5801_177	2B	115.8	0.000283026	0.0792077		0.000530902
203	TKW	thousand kernels weight	Tdurum_contig11733_825	4B	5.98	0.000653054	0.06971316608532652							0.000653054
204	TKW	thousand kernels weight	Excalibur_c27349_166	4B	77.9	0.000267025	0.0826132		0.000267025	0.000838702		0.000693378
205	TKW	thousand kernels weight	BS00034303_51	5A	46	0.000563825	0.0708999012600356			0.000563825
206	TKW	thousand kernels weight	RAC875_rep_c112818_307	5A	98.9	2.23024e-05	0.108891		2.23024e-05			6.06159e-05
207	TKW	thousand kernels weight	BS00021911_51	5D	119.5	0.000595193	0.07205529719440208							0.000595193
208	TKW	thousand kernels weight	wsnp_Ex_rep_c68491_67318138	5D	184	0.000871383	0.06603368627145181			0.000871383
209	TKW	thousand kernels weight	D_contig27392_286	5D	200.3	0.000589821	0.0694256					0.000589821
210	TKW	thousand kernels weight	wsnp_Ex_rep_c68175_66950387	6A	31.8	0.000193134	0.0793971		0.000458485
211	TKW	thousand kernels weight	TA003021-1057	6A	56.1	1.66805e-06	0.141588		1.66805e-06			7.75578e-05		6.41558e-05	0.000261498
212	TKW	thousand kernels weight	BS00023009_51	6B	122.9	0.000656617	0.06794389884121896								0.000656617
213	TKW	thousand kernels weight	TA003458-0086	7A	133.9	4.55594e-05	0.100214		4.55594e-05	0.000959196
214	TKW	thousand kernels weight	BS00111144_51	7B	52.1	0.000813162	0.06661946757184933				0.000813162
215	TKW	thousand kernels weight	wsnp_Ku_c4560_8232439	7B	62.4	0.000821913	0.06691789226758509							0.000821913
216	TKW	thousand kernels weight	wsnp_CAP11_c1196_692246	7B	72.7	0.00065593	0.07329290472412485							0.00065593
217	TKW	thousand kernels weight	BS00063744_51	7B	99.2	2.8338e-05	0.10673734383009405							2.8338e-05	0.000465537
218	TKW	thousand kernels weight	RAC875_c23140_909	7D	0	0.000620719	0.07017284164433028							0.000620719
219	TKW	thousand kernels weight	IAV5907	7D	157.7	0.000729553	0.06830775503434695							0.000729553
220	TKW	thousand kernels weight	GENE-2220_165	7D	161.1	0.00025109	0.08841685165556609							0.00025109
221	YM2	kernels yield per m2	RAC875_c4015_2175	2A	57.1	0.000899125	0.0638998163535996				0.000899125
222	YM2	kernels yield per m2	wsnp_Ex_rep_c108004_91402649	2A	167.8	0.00063974	0.07034504520624288			0.00063974
223	YM2	kernels yield per m2	IAV2277	2B	39.5	0.000973119	0.0645509						0.000973119
224	YM2	kernels yield per m2	BS00041585_51	2B	69.7	0.000973119	0.0645509						0.000973119
225	YM2	kernels yield per m2	wsnp_Ex_c18250_27065775	3D	40.5	0.000759765	0.0696622					0.000759765
226	YM2	kernels yield per m2	BS00061125_51	3D	149.8	0.000309565	0.0761307	0.000309565			0.000861903
227	YM2	kernels yield per m2	wsnp_JD_c64_103934	4A	3.2	0.000360383	0.07698395381685792			0.000360383
228	YM2	kernels yield per m2	BS00059503_51	4A	108.7	0.000540403	0.07260699416371523							0.000540403
229	YM2	kernels yield per m2	BobWhite_c47168_289	4A	144.3	0.000915959	0.06523198926419417								0.000915959
230	YM2	kernels yield per m2	RAC875_c36363_222	4A	150.6	0.000204869	0.08246190807169512								0.000204869
231	YM2	kernels yield per m2	Kukri_c41594_74	5A	34	0.000989533	0.06721535274089063								0.000989533
232	YM2	kernels yield per m2	BS00102828_51	5B	3.9	0.000778936	0.06577936090347011				0.000778936
233	YM2	kernels yield per m2	Excalibur_c24825_539	6A	122.3	0.000600715	0.0692532		0.000600715
234	YM2	kernels yield per m2	BS00096240_51	6A	130.7	0.00014289	0.08454161073512304				0.00014289
235	YM2	kernels yield per m2	Excalibur_rep_c102994_1003	6B	36.6	0.000345442	0.07927606388392594			0.000345442
236	YM2	kernels yield per m2	wsnp_Ex_c11003_17857759	7B	77.2	0.000525977	0.0817928	0.000525977			0.000987184					aded
237	YM2	kernels yield per m2	Tdurum_contig15734_221	7B	118.6	0.000357161	0.0785023		0.000357161
